# Supplementary material for: How social engagement against Covid-19 in a Brazilian Slum helped mitigate rising statistics
Source: bioRxiv or medRxiv preprint supplement (doi:10.1101/2021.01.06.21249243), 2022-01-24
Supplement: Supplementary file [file media-1.pdf]

# Supplementary material – S1 – Covid-19 database for Rio de Janeiro City

## How social engagement against Covid-19 in a Brazilian Slum helped mitigate rising statistics

Heitor Evangelista<sup>1</sup>, Sérgio J. Gonçalves Junior<sup>1\*</sup>, Eduardo Delfino Sodré<sup>1</sup>, Juliana Nogueira<sup>1</sup>, Rodrigo Goldenberg-Barbosa<sup>1</sup>, Newton Magalhães<sup>1</sup>, Angela M.G. dos Santos<sup>2</sup>, Ricardo H.M. Godoi<sup>3</sup>; Cesar Amaral<sup>1</sup>, Marcio Cataldo G. da Silva<sup>1</sup>, Daniel A. Junger de Oliveira<sup>1</sup>, Luís Cristóvão Porto<sup>2</sup>

<sup>1</sup>LARAMG - Laboratory of Radioecology and Global Changes/DBB/IBRAG. Uerj, Pavilhão Haroldo L. Cunha/DBB/IBRAG. Rua São Francisco Xavier 524. Maracanã, Rio de Janeiro State University, Rio de Janeiro, 20550-013. Brazil.

<sup>2</sup>Policlínica Piquet Carneiro/Laboratório de Histocompatibilidade e Criopreservação, Rio de Janeiro State University (Uerj). Av. Mal. Rondon, 381 - São Francisco Xavier, Rio de Janeiro - RJ, 20950-003. Brazil.

<sup>3</sup>Environmental Engineering Department, Federal University of Paraná (UFPR), Curitiba, PR, Brazil

\* To whom correspondence should be addressed: Sérgio J. Gonçalves Jr.

[sjrgoncalves@hotmail.com](mailto:sjrgoncalves@hotmail.com)

### PROGRAM “COVID-19 no Rio de Janeiro”

#### Covid-19 Cases in Rio de Janeiro City

Health Secretaries of the Rio de Janeiro State/Centro de Informações Estratégicas e Respostas de Vigilância em saúde (CIEVS-RJ)

[http://sistemas.saude.rj.gov.br/tabnetbd/webtabx.exe?covid19/esus\\_sivep.def](http://sistemas.saude.rj.gov.br/tabnetbd/webtabx.exe?covid19/esus_sivep.def)

| Day of Notification<br>year/month/day | Rio de Janeiro City<br>CASES (N) |
|---------------------------------------|----------------------------------|
| 2020/04/01                            | 255                              |
| 2020/04/02                            | 308                              |

|            |       |
|------------|-------|
| 2020/04/03 | 359   |
| 2020/04/04 | 155   |
| 2020/04/05 | 109   |
| 2020/04/06 | 546   |
| 2020/04/07 | 564   |
| 2020/04/08 | 459   |
| 2020/04/09 | 365   |
| 2020/04/10 | 405   |
| 2020/04/11 | 385   |
| 2020/04/12 | 417   |
| 2020/04/13 | 706   |
| 2020/04/14 | 997   |
| 2020/04/15 | 773   |
| 2020/04/16 | 761   |
| 2020/04/17 | 635   |
| 2020/04/18 | 279   |
| 2020/04/19 | 340   |
| 2020/04/20 | 1,193 |
| 2020/04/21 | 351   |
| 2020/04/22 | 784   |
| 2020/04/23 | 373   |
| 2020/04/24 | 1,282 |
| 2020/04/25 | 391   |
| 2020/04/26 | 311   |
| 2020/04/27 | 1,321 |
| 2020/04/28 | 1,638 |
| 2020/04/29 | 1,063 |
| 2020/04/30 | 1,178 |
| 2020/05/01 | 401   |
| 2020/05/02 | 387   |
| 2020/05/03 | 328   |
| 2020/05/04 | 1,242 |
| 2020/05/05 | 1,131 |
| 2020/05/06 | 1,048 |
| 2020/05/07 | 993   |
| 2020/05/08 | 1,032 |
| 2020/05/09 | 295   |
| 2020/05/10 | 244   |
| 2020/05/11 | 773   |
| 2020/05/12 | 1,080 |
| 2020/05/13 | 1,146 |
| 2020/05/14 | 868   |
| 2020/05/15 | 762   |
| 2020/05/16 | 369   |
| 2020/05/17 | 288   |
| 2020/05/18 | 830   |

|            |       |
|------------|-------|
| 2020/05/19 | 1,268 |
| 2020/05/20 | 992   |
| 2020/05/21 | 1,119 |
| 2020/05/22 | 907   |
| 2020/05/23 | 344   |
| 2020/05/24 | 539   |
| 2020/05/25 | 866   |
| 2020/05/26 | 674   |
| 2020/05/27 | 1,191 |
| 2020/05/28 | 981   |
| 2020/05/29 | 876   |
| 2020/05/30 | 391   |
| 2020/05/31 | 472   |
| 2020/06/01 | 946   |
| 2020/06/02 | 822   |
| 2020/06/03 | 981   |
| 2020/06/04 | 725   |
| 2020/06/05 | 582   |
| 2020/06/06 | 186   |
| 2020/06/07 | 203   |
| 2020/06/08 | 835   |
| 2020/06/09 | 867   |
| 2020/06/10 | 793   |
| 2020/06/11 | 232   |
| 2020/06/12 | 789   |
| 2020/06/13 | 297   |
| 2020/06/14 | 338   |
| 2020/06/15 | 1,297 |
| 2020/06/16 | 1,389 |
| 2020/06/17 | 1,585 |
| 2020/06/18 | 983   |
| 2020/06/19 | 1,043 |
| 2020/06/20 | 184   |
| 2020/06/21 | 250   |
| 2020/06/22 | 1,174 |
| 2020/06/23 | 711   |
| 2020/06/24 | 823   |
| 2020/06/25 | 739   |
| 2020/06/26 | 523   |
| 2020/06/27 | 279   |
| 2020/06/28 | 134   |
| 2020/06/29 | 602   |
| 2020/06/30 | 795   |
| 2020/07/01 | 703   |
| 2020/07/02 | 657   |
| 2020/07/03 | 451   |

|            |       |
|------------|-------|
| 2020/07/04 | 229   |
| 2020/07/05 | 204   |
| 2020/07/06 | 627   |
| 2020/07/07 | 592   |
| 2020/07/08 | 529   |
| 2020/07/09 | 422   |
| 2020/07/10 | 436   |
| 2020/07/11 | 129   |
| 2020/07/12 | 166   |
| 2020/07/13 | 462   |
| 2020/07/14 | 427   |
| 2020/07/15 | 390   |
| 2020/07/16 | 236   |
| 2020/07/17 | 377   |
| 2020/07/18 | 103   |
| 2020/07/19 | 66    |
| 2020/07/20 | 464   |
| 2020/07/21 | 753   |
| 2020/07/22 | 574   |
| 2020/07/23 | 552   |
| 2020/07/24 | 457   |
| 2020/07/25 | 262   |
| 2020/07/26 | 267   |
| 2020/07/27 | 658   |
| 2020/07/28 | 774   |
| 2020/07/29 | 605   |
| 2020/07/30 | 405   |
| 2020/07/31 | 619   |
| 2020/08/01 | 121   |
| 2020/08/02 | 85    |
| 2020/08/03 | 580   |
| 2020/08/04 | 655   |
| 2020/08/05 | 584   |
| 2020/08/06 | 465   |
| 2020/08/07 | 517   |
| 2020/08/08 | 165   |
| 2020/08/09 | 80    |
| 2020/08/10 | 787   |
| 2020/08/11 | 1,375 |
| 2020/08/12 | 897   |
| 2020/08/13 | 1,364 |
| 2020/08/14 | 754   |
| 2020/08/15 | 184   |
| 2020/08/16 | 168   |
| 2020/08/17 | 906   |
| 2020/08/18 | 1,118 |

|            |       |
|------------|-------|
| 2020/08/19 | 943   |
| 2020/08/20 | 808   |
| 2020/08/21 | 804   |
| 2020/08/22 | 145   |
| 2020/08/23 | 397   |
| 2020/08/24 | 791   |
| 2020/08/25 | 804   |
| 2020/08/26 | 594   |
| 2020/08/27 | 483   |
| 2020/08/28 | 457   |
| 2020/08/29 | 179   |
| 2020/08/30 | 94    |
| 2020/08/31 | 774   |
| 2020/09/01 | 748   |
| 2020/09/02 | 699   |
| 2020/09/03 | 614   |
| 2020/09/04 | 484   |
| 2020/09/05 | 275   |
| 2020/09/06 | 157   |
| 2020/09/07 | 137   |
| 2020/09/08 | 801   |
| 2020/09/09 | 755   |
| 2020/09/10 | 1,054 |
| 2020/09/11 | 561   |
| 2020/09/12 | 191   |
| 2020/09/13 | 144   |
| 2020/09/14 | 835   |
| 2020/09/15 | 717   |
| 2020/09/16 | 807   |
| 2020/09/17 | 690   |
| 2020/09/18 | 723   |
| 2020/09/19 | 194   |
| 2020/09/20 | 152   |
| 2020/09/21 | 802   |
| 2020/09/22 | 836   |
| 2020/09/23 | 610   |
| 2020/09/24 | 573   |
| 2020/09/25 | 588   |
| 2020/09/26 | 266   |
| 2020/09/27 | 125   |
| 2020/09/28 | 871   |
| 2020/09/29 | 1,048 |
| 2020/09/30 | 706   |
| 2020/10/01 | 756   |
| 2020/10/02 | 902   |
| 2020/10/03 | 182   |

|            |       |
|------------|-------|
| 2020/10/04 | 122   |
| 2020/10/05 | 1,052 |
| 2020/10/06 | 767   |
| 2020/10/07 | 723   |
| 2020/10/08 | 684   |
| 2020/10/09 | 723   |
| 2020/10/10 | 183   |
| 2020/10/11 | 119   |
| 2020/10/12 | 141   |
| 2020/10/13 | 931   |
| 2020/10/14 | 785   |
| 2020/10/15 | 680   |
| 2020/10/16 | 653   |
| 2020/10/17 | 288   |
| 2020/10/18 | 127   |
| 2020/10/19 | 538   |
| 2020/10/20 | 595   |
| 2020/10/21 | 451   |
| 2020/10/22 | 503   |
| 2020/10/23 | 571   |
| 2020/10/24 | 155   |
| 2020/10/25 | 118   |
| 2020/10/26 | 799   |
| 2020/10/27 | 668   |
| 2020/10/28 | 506   |
| 2020/10/29 | 629   |
| 2020/10/30 | 421   |
| 2020/10/31 | 252   |
| 2020/11/01 | 218   |
| 2020/11/02 | 236   |
| 2020/11/03 | 757   |
| 2020/11/04 | 603   |
| 2020/11/05 | 842   |
| 2020/11/06 | 771   |
| 2020/11/07 | 239   |
| 2020/11/08 | 189   |
| 2020/11/09 | 1,063 |
| 2020/11/10 | 976   |
| 2020/11/11 | 814   |
| 2020/11/12 | 880   |
| 2020/11/13 | 948   |
| 2020/11/14 | 325   |
| 2020/11/15 | 204   |
| 2020/11/16 | 1,348 |
| 2020/11/17 | 1,174 |
| 2020/11/18 | 1,153 |

|            |       |
|------------|-------|
| 2020/11/19 | 1,183 |
| 2020/11/20 | 457   |
| 2020/11/21 | 443   |
| 2020/11/22 | 283   |
| 2020/11/23 | 1,624 |
| 2020/11/24 | 1,979 |
| 2020/11/25 | 1,519 |
| 2020/11/26 | 1,992 |
| 2020/11/27 | 1,967 |
| 2020/11/28 | 663   |
| 2020/11/29 | 291   |
| 2020/11/30 | 2,777 |
| 2020/12/01 | 2,241 |
| 2020/12/02 | 2,179 |
| 2020/12/03 | 2,008 |
| 2020/12/04 | 1,837 |
| 2020/12/05 | 500   |
| 2020/12/06 | 303   |
| 2020/12/07 | 2,279 |
| 2020/12/08 | 2,400 |
| 2020/12/09 | 2,060 |
| 2020/12/10 | 2,032 |
| 2020/12/11 | 1,800 |
| 2020/12/12 | 331   |
| 2020/12/13 | 277   |
| 2020/12/14 | 1,582 |
| 2020/12/15 | 2,155 |
| 2020/12/16 | 1,717 |
| 2020/12/17 | 1,805 |
| 2020/12/18 | 1,386 |
| 2020/12/19 | 464   |
| 2020/12/20 | 288   |
| 2020/12/21 | 2,031 |
| 2020/12/22 | 1,540 |
| 2020/12/23 | 1,501 |
| 2020/12/24 | 621   |
| 2020/12/25 | 201   |
| 2020/12/26 | 524   |
| 2020/12/27 | 202   |
| 2020/12/28 | 2,565 |
| 2020/12/29 | 2,043 |
| 2020/12/30 | 1,705 |
| 2020/12/31 | 663   |
| 2021/01/01 | 268   |
| 2021/01/02 | 474   |
| 2021/01/03 | 260   |

|            |       |
|------------|-------|
| 2021/01/04 | 2,887 |
| 2021/01/05 | 2,160 |
| 2021/01/06 | 1,759 |
| 2021/01/07 | 1,579 |
| 2021/01/08 | 1,420 |
| 2021/01/09 | 456   |
| 2021/01/10 | 251   |
| 2021/01/11 | 1,810 |
| 2021/01/12 | 1,561 |
| 2021/01/13 | 1,294 |
| 2021/01/14 | 1,306 |
| 2021/01/15 | 1,103 |
| 2021/01/16 | 334   |
| 2021/01/17 | 202   |
| 2021/01/18 | 1,519 |
| 2021/01/19 | 1,046 |
| 2021/01/20 | 337   |
| 2021/01/21 | 903   |
| 2021/01/22 | 1,030 |
| 2021/01/23 | 262   |
| 2021/01/24 | 144   |
| 2021/01/25 | 1,187 |
| 2021/01/26 | 963   |
| 2021/01/27 | 917   |
| 2021/01/28 | 806   |
| 2021/01/29 | 620   |
| 2021/01/30 | 186   |
| 2021/01/31 | 249   |
| 2021/02/01 | 758   |
| 2021/02/02 | 718   |
| 2021/02/03 | 581   |
| 2021/02/04 | 577   |
| 2021/02/05 | 568   |
| 2021/02/06 | 185   |
| 2021/02/07 | 141   |
| 2021/02/08 | 754   |
| 2021/02/09 | 603   |
| 2021/02/10 | 640   |
| 2021/02/11 | 579   |
| 2021/02/12 | 525   |
| 2021/02/13 | 143   |
| 2021/02/14 | 85    |
| 2021/02/15 | 545   |
| 2021/02/16 | 190   |
| 2021/02/17 | 746   |
| 2021/02/18 | 673   |



|            |       |
|------------|-------|
| 2021/02/19 | 622   |
| 2021/02/20 | 168   |
| 2021/02/21 | 97    |
| 2021/02/22 | 951   |
| 2021/02/23 | 684   |
| 2021/02/24 | 739   |
| 2021/02/25 | 682   |
| 2021/02/26 | 559   |
| 2021/02/27 | 158   |
| 2021/02/28 | 103   |
| 2021/03/01 | 842   |
| 2021/03/02 | 725   |
| 2021/03/03 | 772   |
| 2021/03/04 | 888   |
| 2021/03/05 | 811   |
| 2021/03/06 | 166   |
| 2021/03/07 | 151   |
| 2021/03/08 | 1,365 |
| 2021/03/09 | 1,020 |
| 2021/03/10 | 1,150 |
| 2021/03/11 | 1,051 |
| 2021/03/12 | 1,099 |
| 2021/03/13 | 311   |
| 2021/03/14 | 200   |
| 2021/03/15 | 1,775 |
| 2021/03/16 | 1,385 |
| 2021/03/17 | 1,438 |
| 2021/03/18 | 1,383 |
| 2021/03/19 | 1,328 |
| 2021/03/20 | 468   |
| 2021/03/21 | 286   |
| 2021/03/22 | 2,219 |
| 2021/03/23 | 1,724 |
| 2021/03/24 | 1,466 |
| 2021/03/25 | 1,472 |
| 2021/03/26 | 1,518 |
| 2021/03/27 | 489   |
| 2021/03/28 | 371   |
| 2021/03/29 | 2,092 |
| 2021/03/30 | 1,731 |
| 2021/03/31 | 1,628 |
| 2021/04/01 | 1,474 |
| 2021/04/02 | 593   |
| 2021/04/03 | 539   |
| 2021/04/04 | 301   |
| 2021/04/05 | 2,342 |

|            |       |
|------------|-------|
| 2021/04/06 | 1,605 |
| 2021/04/07 | 1,477 |
| 2021/04/08 | 1,484 |
| 2021/04/09 | 1,318 |
| 2021/04/10 | 399   |
| 2021/04/11 | 226   |
| 2021/04/12 | 1,865 |
| 2021/04/13 | 1,326 |
| 2021/04/14 | 1,394 |
| 2021/04/15 | 1,397 |
| 2021/04/16 | 1,450 |
| 2021/04/17 | 426   |
| 2021/04/18 | 277   |
| 2021/04/19 | 1,874 |
| 2021/04/20 | 1,566 |
| 2021/04/21 | 848   |
| 2021/04/22 | 1,408 |
| 2021/04/23 | 952   |
| 2021/04/24 | 392   |
| 2021/04/25 | 240   |
| 2021/04/26 | 2,181 |
| 2021/04/27 | 1,708 |
| 2021/04/28 | 1,417 |
| 2021/04/29 | 1,277 |
| 2021/04/30 | 1,167 |
| 2021/05/01 | 336   |
| 2021/05/02 | 233   |
| 2021/05/03 | 1,779 |
| 2021/05/04 | 1,515 |
| 2021/05/05 | 1,549 |
| 2021/05/06 | 1,576 |
| 2021/05/07 | 1,352 |
| 2021/05/08 | 354   |
| 2021/05/09 | 234   |
| 2021/05/10 | 1,823 |
| 2021/05/11 | 1,630 |
| 2021/05/12 | 1,474 |
| 2021/05/13 | 1,460 |
| 2021/05/14 | 1,402 |
| 2021/05/15 | 573   |
| 2021/05/16 | 284   |
| 2021/05/17 | 2,063 |
| 2021/05/18 | 1,788 |
| 2021/05/19 | 1,653 |
| 2021/05/20 | 1,552 |
| 2021/05/21 | 1,550 |

|            |       |
|------------|-------|
| 2021/05/22 | 593   |
| 2021/05/23 | 251   |
| 2021/05/24 | 1,974 |
| 2021/05/25 | 1,610 |
| 2021/05/26 | 1,350 |
| 2021/05/27 | 1,543 |
| 2021/05/28 | 1,247 |
| 2021/05/29 | 582   |
| 2021/05/30 | 306   |
| 2021/05/31 | 1,915 |
| 2021/06/01 | 1,636 |
| 2021/06/02 | 1,535 |
| 2021/06/03 | 417   |
| 2021/06/04 | 1,673 |
| 2021/06/05 | 512   |
| 2021/06/06 | 267   |
| 2021/06/07 | 1,836 |
| 2021/06/08 | 1,551 |
| 2021/06/09 | 1,380 |
| 2021/06/10 | 1,384 |
| 2021/06/11 | 1,303 |
| 2021/06/12 | 340   |
| 2021/06/13 | 169   |
| 2021/06/14 | 1,451 |
| 2021/06/15 | 1,116 |
| 2021/06/16 | 1,228 |
| 2021/06/17 | 1,120 |
| 2021/06/18 | 1,017 |
| 2021/06/19 | 270   |
| 2021/06/20 | 159   |
| 2021/06/21 | 1,611 |
| 2021/06/22 | 1,056 |
| 2021/06/23 | 1,024 |
| 2021/06/24 | 1,179 |
| 2021/06/25 | 1,008 |
| 2021/06/26 | 383   |
| 2021/06/27 | 179   |
| 2021/06/28 | 1,517 |
| 2021/06/29 | 607   |
| 2021/06/30 | 870   |
| 2021/07/01 | 1,021 |
| 2021/07/02 | 914   |
| 2021/07/03 | 243   |
| 2021/07/04 | 171   |
| 2021/07/05 | 1,401 |
| 2021/07/06 | 1,020 |

|            |       |
|------------|-------|
| 2021/07/07 | 891   |
| 2021/07/08 | 1,075 |
| 2021/07/09 | 1,036 |
| 2021/07/10 | 328   |
| 2021/07/11 | 214   |
| 2021/07/12 | 1,072 |
| 2021/07/13 | 1,508 |
| 2021/07/14 | 1,146 |
| 2021/07/15 | 1,173 |
| 2021/07/16 | 1,364 |
| 2021/07/17 | 343   |
| 2021/07/18 | 216   |
| 2021/07/19 | 973   |
| 2021/07/20 | 1,601 |
| 2021/07/21 | 1,404 |
| 2021/07/22 | 1,309 |
| 2021/07/23 | 1,319 |
| 2021/07/24 | 439   |
| 2021/07/25 | 234   |
| 2021/07/26 | 2,007 |
| 2021/07/27 | 1,733 |
| 2021/07/28 | 1,618 |
| 2021/07/29 | 1,396 |
| 2021/07/30 | 1,408 |
| 2021/07/31 | 625   |
| 2021/08/01 | 293   |
| 2021/08/02 | 2,181 |
| 2021/08/03 | 1,920 |
| 2021/08/04 | 1,927 |
| 2021/08/05 | 1,972 |
| 2021/08/06 | 1,921 |
| 2021/08/07 | 645   |
| 2021/08/08 | 297   |
| 2021/08/09 | 2,557 |
| 2021/08/10 | 2,637 |
| 2021/08/11 | 2,399 |
| 2021/08/12 | 2,414 |
| 2021/08/13 | 2,093 |
| 2021/08/14 | 779   |
| 2021/08/15 | 319   |
| 2021/08/16 | 3,213 |
| 2021/08/17 | 2,741 |
| 2021/08/18 | 2,543 |
| 2021/08/19 | 2,450 |
| 2021/08/20 | 2,156 |
| 2021/08/21 | 636   |

|            |       |
|------------|-------|
| 2021/08/22 | 332   |
| 2021/08/23 | 3,083 |
| 2021/08/24 | 2,362 |
| 2021/08/25 | 2,046 |
| 2021/08/26 | 1,994 |
| 2021/08/27 | 1,934 |
| 2021/08/28 | 578   |
| 2021/08/29 | 244   |
| 2021/08/30 | 2,566 |
| 2021/08/31 | 1,796 |
| 2021/09/01 | 1,594 |
| 2021/09/02 | 1,667 |
| 2021/09/03 | 1,591 |
| 2021/09/04 | 614   |
| 2021/09/05 | 251   |
| 2021/09/06 | 1,640 |
| 2021/09/07 | 283   |
| 2021/09/08 | 1,046 |
| 2021/09/09 | 1,037 |
| 2021/09/10 | 981   |
| 2021/09/11 | 360   |
| 2021/09/12 | 258   |
| 2021/09/13 | 1,467 |
| 2021/09/14 | 1,343 |
| 2021/09/15 | 1,029 |
| 2021/09/16 | 741   |
| 2021/09/17 | 821   |
| 2021/09/18 | 258   |
| 2021/09/19 | 122   |
| 2021/09/20 | 1,219 |
| 2021/09/21 | 679   |
| 2021/09/22 | 752   |
| 2021/09/23 | 664   |
| 2021/09/24 | 642   |
| 2021/09/25 | 208   |
| 2021/09/26 | 118   |
| 2021/09/27 | 869   |
| 2021/09/28 | 569   |
| 2021/09/29 | 485   |
| 2021/09/30 | 541   |
